# Supplementary material for: Triaging women with human papillomavirus infection and normal cytology or low‐grade dyskaryosis: evidence from 10‐year follow up of the ARTISTIC trial cohort
Source: PubMed Central journal article supplement (PMC6916371; doi:10.1111/1471-0528.15957), 2019-11-07
Supplement: BJO-127-58-s001.pdf [file BJO-127-58-s001.pdf]

**Table S1.** Cumulative CIN3+ risks from round 2 by HPV partial genotype and cytology. Invasive cervical cancers (ICC) are also shown in brackets

| HPV/cytology at round 2              | Follow-up from round 2 (2.5 to 4 years after entry) |                            |               |       |                |                          |       |                |                           |       |                |
|--------------------------------------|-----------------------------------------------------|----------------------------|---------------|-------|----------------|--------------------------|-------|----------------|---------------------------|-------|----------------|
|                                      | 2.5 year risk from round 2                          |                            |               |       |                | 5 year risk from round 2 |       |                | 10 year risk from round 2 |       |                |
|                                      | n (% <sup>1</sup> ) at round 2                      | n CIN3+ (ICC) <sup>2</sup> | n CIN3+ (ICC) | %     | 95% CI         | n CIN3+ (ICC)            | %     | 95% CI         | n CIN3+ (ICC)             | %     | 95% CI         |
| <b>HR-HPV negative<sup>3</sup></b>   | 12802 (94.7%)                                       | 21 (2)                     | 11            | 0.09% | (0.05%, 0.15%) | 15 (1)                   | 0.12% | (0.07%, 0.19%) | 21 (2)                    | 0.17% | (0.11%, 0.26%) |
| <b>HR-HPV positive</b>               | 713 (5.3%)                                          | 60 (5)                     | 51 (2)        | 7.2%  | (5.5%, 9.3%)   | 55 (3)                   | 7.7%  | (6.0%, 9.9%)   | 60 (5)                    | 8.4%  | (6.6%, 10.7%)  |
| <b>Normal cytology</b>               |                                                     |                            |               |       |                |                          |       |                |                           |       |                |
| <b>HPV16/HPV18</b>                   | 151 (21.2%)                                         | 12 (2)                     | 9 (1)         | 6.0%  | (3.2%, 11.1%)  | 11 (1)                   | 7.3%  | (4.1%, 12.8%)  | 12 (2)                    | 8.0%  | (4.6%, 13.6%)  |
| <b>Other HR-HPV</b>                  | 333 (46.7%)                                         | 10 (3)                     | 6 (1)         | 1.8%  | (0.8%, 4.0%)   | 7 (2)                    | 2.1%  | (1.0%, 4.4%)   | 10 (3)                    | 3.0%  | (1.6%, 5.5%)   |
| <b>All HR-HPV+</b>                   | 484 (67.9%)                                         | 22 (5)                     | 15 (2)        | 3.1%  | (1.9%, 5.1%)   | 18 (3)                   | 3.7%  | (2.4%, 5.8%)   | 22 (5)                    | 4.6%  | (3.0%, 6.9%)   |
| <b>Borderline/low-grade cytology</b> |                                                     |                            |               |       |                |                          |       |                |                           |       |                |
| <b>HPV16/HPV18</b>                   | 84 (11.8%)                                          | 13                         | 13            | 15.5% | (9.3%, 25.2%)  | 13                       | 15.5% | (9.3%, 25.2%)  | 13                        | 15.5% | (9.3%, 25.2%)  |
| <b>Other HR-HPV</b>                  | 112 (15.7%)                                         | 9                          | 7             | 6.3%  | (3.0%, 12.7%)  | 8                        | 7.1%  | (3.6%, 13.8%)  | 9                         | 8.1%  | (4.3%, 14.9%)  |
| <b>All HR-HPV+</b>                   | 196 (27.5%)                                         | 22                         | 20            | 10.2% | (6.7%, 15.4%)  | 21                       | 10.7% | (7.1%, 16.0%)  | 22                        | 11.2% | (7.5%, 16.6%)  |
| <b>Moderate/Severe cytology</b>      |                                                     |                            |               |       |                |                          |       |                |                           |       |                |
| <b>HPV16/HPV18</b>                   | 20 (2.8%)                                           | 8                          | 8             | 40.0% | (22.4%, 64.3%) | 8                        | 40.0% | (22.4%, 64.3%) | 8                         | 40.0% | (22.4%, 64.3%) |
| <b>Other HR-HPV</b>                  | 13 (1.8%)                                           | 8                          | 8             | 61.5% | (37.2%, 86.0%) | 8                        | 61.5% | (37.2%, 86.0%) | 8                         | 61.5% | (37.2%, 86.0%) |
| <b>All HR-HPV+</b>                   | 33 (4.6%)                                           | 16                         | 16            | 48.5% | (33.2%, 66.5%) | 16                       | 48.5% | (33.2%, 66.5%) | 16                        | 48.5% | (33.2%, 66.5%) |
| <b>All women from round 2</b>        | 13515 <sup>4</sup>                                  | 81 (7)                     | 62 (2)        |       |                | 70 (4)                   |       |                | 81 (7)                    |       |                |

<sup>1</sup>Percentages by cytology are given out of total 680 HR-HPV+ women

<sup>2</sup>In 12 to 14 years of follow-up

<sup>3</sup>HC2 negative or HC2 positive with no HR-HPV detected

<sup>4</sup>76 women with no cytology taken at round 2 are excluded from the table
